# Supplementary material for: High Mobility and Flexibility in the Habitat Use of Early Juvenile Pikeperch (Sander lucioperca) Based on a Mark-Recapture Experiment
Source: MDPI journal article supplement (doi:10.3390/d15060720), 2023-05-31
Supplement: s1 [file s1]

## High Mobility and Flexibility in the Habitat Use of Early Juvenile Pikeperch (*Sander lucioperca*) Based on a Mark-Recapture Experiment

Petr Blabolil<sup>1,2,\*</sup>, Tomáš Jůza<sup>1</sup>, Martin Čech<sup>1</sup> and Jiří Peterka<sup>1</sup>

<sup>1</sup> Biology Centre of the Czech Academy of Sciences, Institute of Hydrobiology, Na Sádkách 7, 370 05 České Budějovice, Czech Republic; tomas.juza@hbu.cas.cz (T.J.); martin.cech@hbu.cas.cz (M.Č.); jiri.peterka@hbu.cas.cz (J.P.)

<sup>2</sup> Faculty of Science, University of South Bohemia, Branišovská 1760, 370 05 České Budějovice, Czech Republic

\* Correspondence: petr.blabolil@hbu.cas.cz; Tel.: +420-387-775-838

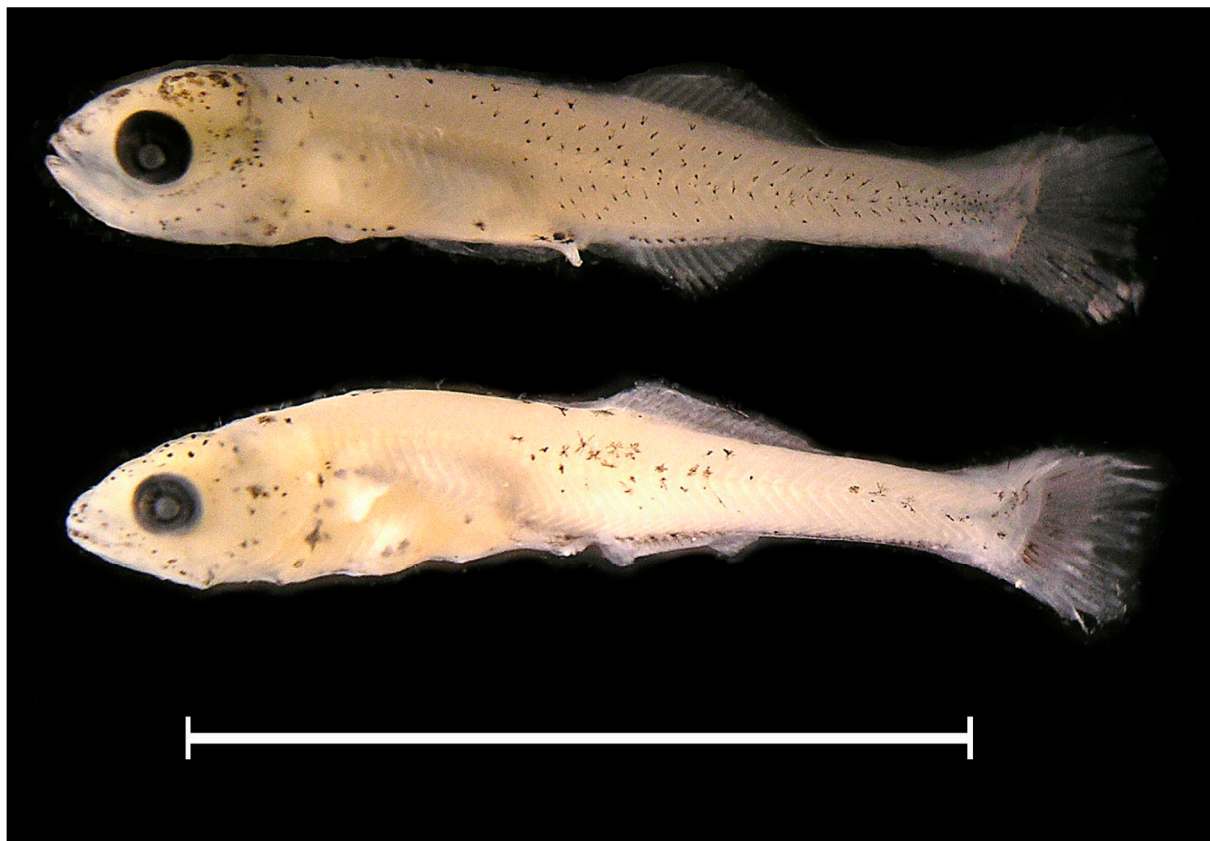

Example of European perch (*Perca fluviatilis*) above and pikeperch (*Sander lucioperca*) below larvae captured in Římov Reservoir. The species differ by pigmentation and by the numbers of post- and pre-anal myomeres. The white bar represents 10 mm. Foto: Jiří Peterka.
